# Supplementary material for: The regulation of PCR by thiolated single-stranded DNA for enhanced specificity
Source: Royal Society of Chemistry journal article supplement (doi:10.1039/c4ra04671d), 2014-01-01
Supplement: c4ra04671d1.pdf [file c4ra04671d1.pdf]

### Supporting Information

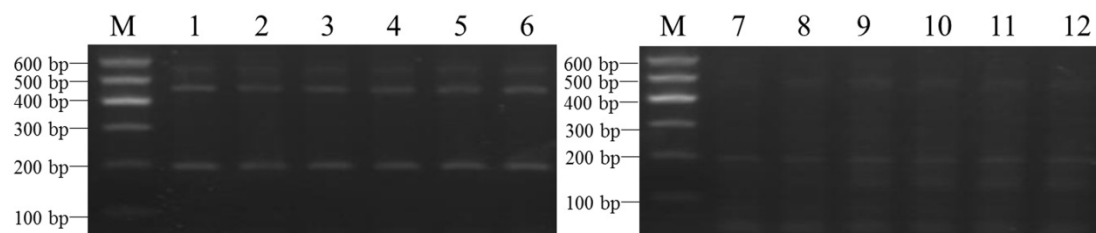

Fig.S1 The gel images for the DTT addition tests. Lane M shows the markers; lanes 1–6 show the results of final DTT concentrations of 0.05, 0.1, 0.15, 0.2, 0.25 and 0.3 mM, respectively; lanes 7–12 show the results of un-modified 5  $\mu$ M ssDNA+0.2 mM DTT, 10  $\mu$ M ssDNA+0.2 mM DTT, 15  $\mu$ M ssDNA+0.2 mM DTT, 20  $\mu$ M ssDNA+0.2 mM DTT, 25  $\mu$ M ssDNA+0.2 mM DTT and 30  $\mu$ M ssDNA+0.2 mM DTT, respectively.
